# Supplementary material for: Modulated phases of lipid membranes induced by sterol derivatives
Source: Royal Society of Chemistry journal article supplement (doi:10.1039/c2sm26601f), 2012-01-01
Supplement: c2sm26601f.pdf [file c2sm26601f.pdf]

## SUPPLEMENTARY INFORMATION

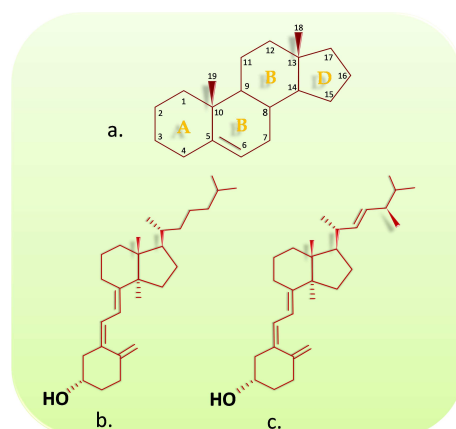

FIG. 1: Chemical structure of the steroid core (a), cholecalciferol (b), and ergocalciferol (c).

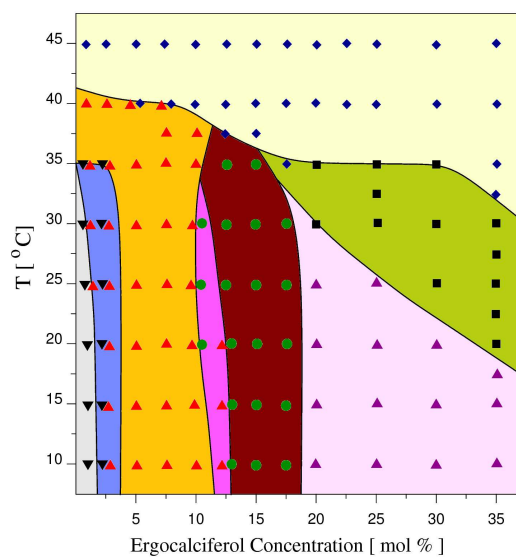

FIG. 2: Partial phase diagram of DPPC-ergocalciferol binary mixtures at  $98 \pm 2\%$  relative humidity. Only the  $L_\alpha$  phase ( $\blacklozenge$ ) occurs above the chain-melting transition temperature over the whole composition range shown, whereas a variety of phases are observed at lower temperatures. As a function of increasing ergocalciferol concentration, these are:  $L_{\beta'}$  ( $\blacktriangledown$ ),  $P_{\beta'}$  ( $\blacktriangle$ ),  $P_\beta$  ( $\bullet$ ),  $P_{\beta'}^*$  ( $\blacktriangle$ ) and RC ( $\blacksquare$ ). Ergocalciferol was found to phase separate out of the membrane for  $\phi_{ec} > 35$  mol%.

TABLE I: Diffraction data from the RC phase used to calculate the electron density profile. I denotes the relative intensity of the reflections after geometric corrections. The phases of the reflections were obtained using the pattern recognition method described in the text.  $\phi_{cc} = 50$  mol%,  $T = 12.5^\circ\text{C}$ .

| hk | I     | Phase |
|----|-------|-------|
| 20 | 100.0 | -     |
| 40 | 42.2  | -     |
| 60 | 1.3   | +     |
| 80 | 2.5   | -     |
| 31 | 0.5   | -     |
| 51 | 5.3   | -     |
| 71 | 2.1   | +     |

TABLE II: Diffraction data from the  $P'_{\beta'}$  phase used to calculate the electron density profile. I denotes the relative intensity of the reflections after geometric corrections. The phases of the reflections were obtained using the pattern recognition method described in the text.  $\phi_{cc} = 25$  mol%,  $T = 10.0^\circ\text{C}$ .

| hk         | I     | Phase |
|------------|-------|-------|
| 10         | 100.0 | -     |
| 20         | 28.7  | -     |
| 30         | 0.2   | +     |
| 40         | 10.9  | -     |
| 11         | 1.1   | -     |
| $2\bar{1}$ | 2.2   | -     |
| 21         | 2.3   | -     |
| $3\bar{1}$ | 2.9   | -     |
| 31         | 1.3   | +     |
| $4\bar{1}$ | 3.1   | +     |

TABLE III: Temperature dependence of the lamellar periodicity  $d$  (in  $\text{\AA}$ ) in different phases of DPPC-cholecalciferol membranes. The cholecalciferol concentration in the bilayer,  $\phi_{cc}$ , is in mol%. Typical error in  $d$  is  $\pm 0.03 \text{\AA}$ .

| $T^\circ\text{C}$              | 40.0 | 37.5 | 35.0 | 30.0 | 27.5 | 25.0 | 22.5 | 20.0 | 17.5 | 15.0 | 10.0 |
|--------------------------------|------|------|------|------|------|------|------|------|------|------|------|
| $P'_{\beta}(\phi_{cc}=7.5)$    | 62.5 | 62.6 | 63.3 | 65.3 | -    | 65.6 | -    | 67.0 | -    | 67.6 | 68.2 |
| $P_{\beta}(\phi_{cc}=12.5)$    | -    | -    | 62.5 | 65.4 | 65.8 | 65.8 | -    | 68.5 | -    | 68.1 | 68.1 |
| $P^*_{\beta'}(\phi_{cc}=20.0)$ | -    | -    | -    | 61.0 | -    | 61.5 | -    | 62.5 | -    | 62.2 | 62.5 |
| $\text{RC}(\phi_{cc}=50.0)$    | -    | -    | -    | -    | 53.2 | 53.9 | 56.8 | 59.0 | 59.9 | 60.4 | -    |

TABLE IV: Temperature dependence of the lamellar periodicity  $d$  (in  $\text{\AA}$ ) in different phases of DPPC-ergocalciferol membranes. The ergocalciferol concentration in the bilayer,  $\phi_{ec}$ , is in mol%. Typical error in  $d$  is  $\pm 0.03 \text{\AA}$ .

| $T^\circ\text{C}$              | 40.0 | 37.5 | 35.0 | 30.0 | 27.5 | 25.0 | 22.5 | 20.0 | 15.0 | 10.0 |
|--------------------------------|------|------|------|------|------|------|------|------|------|------|
| $P'_{\beta}(\phi_{ec}=7.5)$    | 60.2 | 63.4 | 64.2 | 66.2 | -    | 68.0 | -    | 68.9 | 69.6 | 70.2 |
| $P_{\beta}(\phi_{ec}=15.0)$    | -    | -    | 62.2 | 64.2 | -    | 66.2 | -    | 67.4 | 68.0 | 68.6 |
| $P^*_{\beta'}(\phi_{ec}=20.0)$ | -    | -    | -    | -    | -    | 64.2 | -    | 65.6 | 65.4 | 65.8 |
| $\text{RC}(\phi_{ec}=35.0)$    | -    | -    | -    | 57.0 | 57.6 | 57.9 | 59.4 | 61.4 | -    | -    |

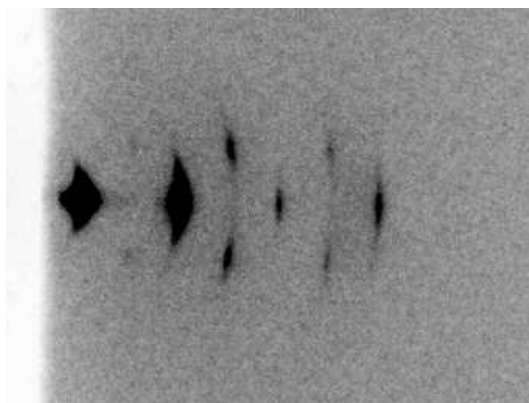

FIG. 3: Diffraction pattern of the RC phase in DPPC-cholecalciferol membranes showing a weak [31] off-axis reflection.  $\phi_{cc} = 50$  mol%,  $T = 12.5^\circ\text{C}$ .

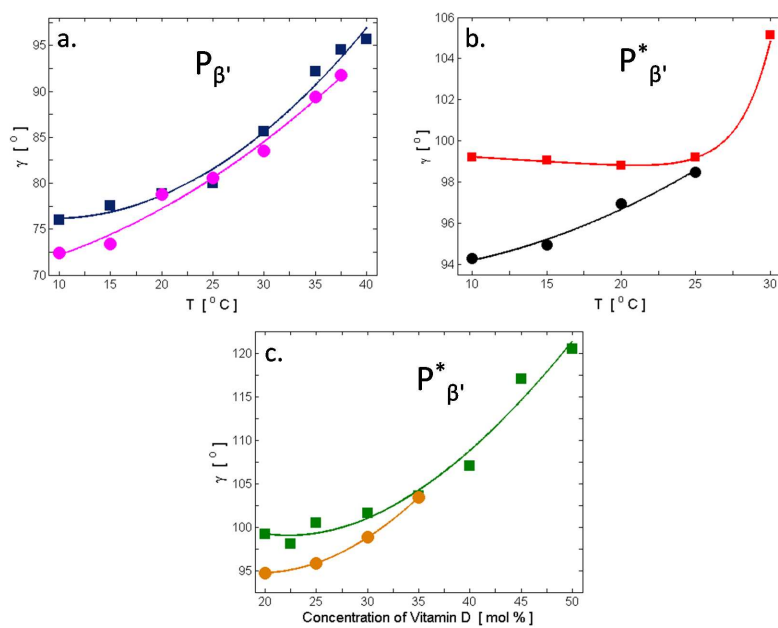

FIG. 4: Variation of the lattice parameter  $\gamma$  with temperature in the  $P_{\beta'}$  (a) and  $P^*_{\beta'}$  (b) phases of DPPC-cholecalciferol (■) and DPPC-ergocalciferol (●) bilayers. Variation of  $\gamma$  with secosteroid concentration in  $P^*_{\beta'}$  phase (c). Secosteroid concentration is 7.5 mol% in (a) and 20 mol% in (b).  $T = 10^\circ\text{C}$  in (c). The smooth lines are merely guides to the eye.

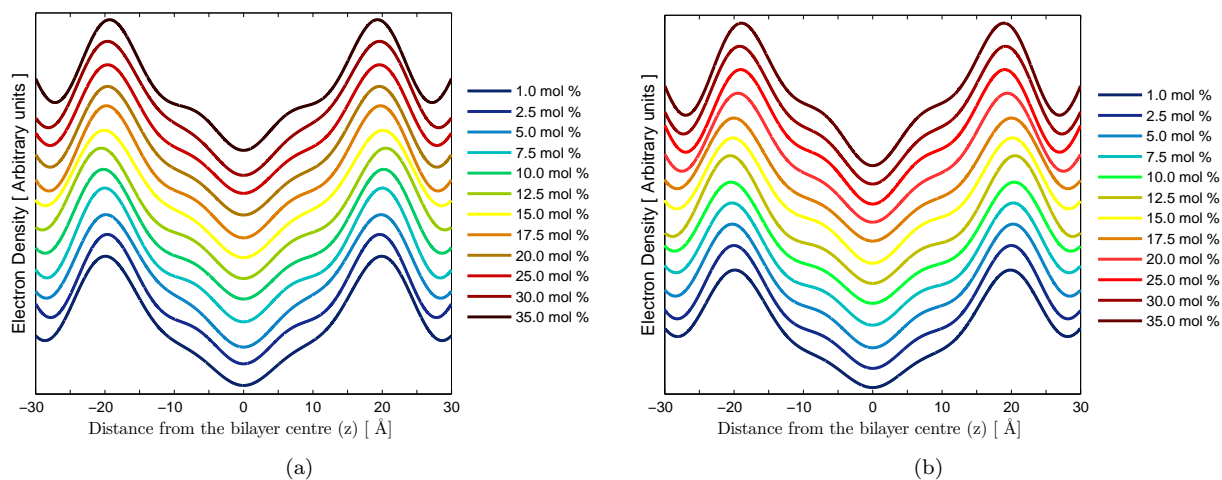

FIG. 5: Variation of the bilayer electron density profile with secosteroid concentration at 45°C in the  $L_{\alpha}$  phase of DPPC-cholecalciferol (a) and DPPC-ergocalciferol (b) bilayers. Phases of the  $[h0]$  reflections in all cases are  $(- - + -)$  for  $h$  going from 1 to 4.

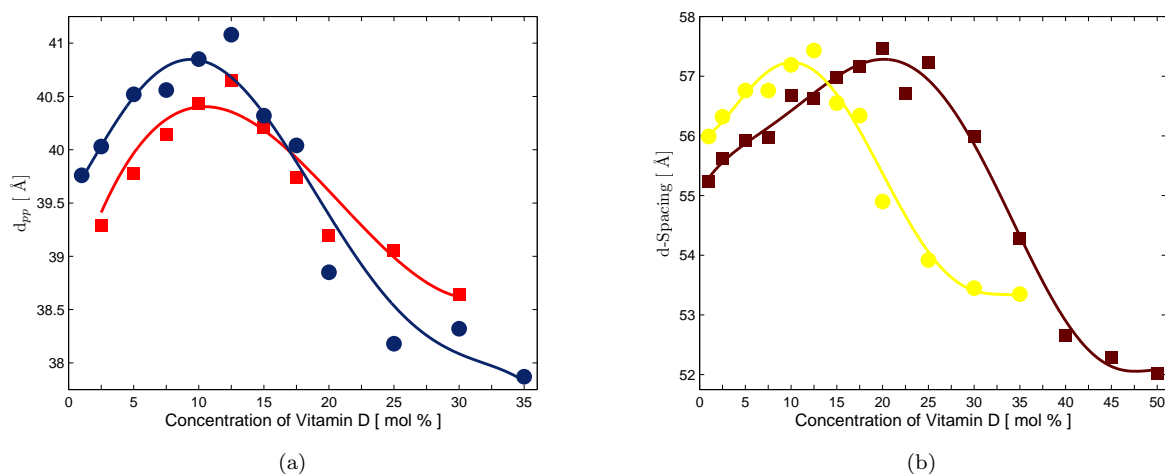

FIG. 6: Variation of the bilayer thickness ( $d_{pp}$ ) (a) and d-spacing (b) with secosteroid concentration at 45°C in the  $L_{\alpha}$  phase of DPPC-cholecalciferol (■) and DPPC-ergocalciferol (●) bilayers. The smooth lines are merely guides to the eye.

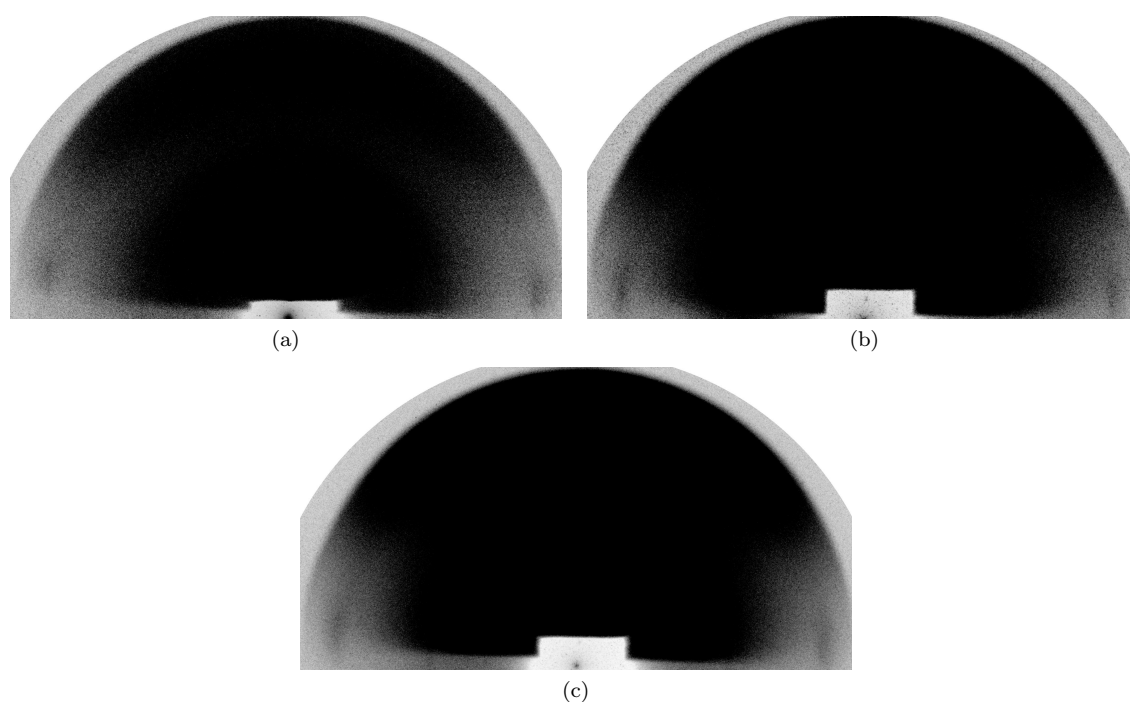

FIG. 7: WAXS patterns of the (a)  $P_{\beta}$  [ $\phi_{ec} = 15.0$  mol%,  $T = 15.0^{\circ}\text{C}$ ], (b)  $P_{\beta'}^*$  [ $\phi_{ec} = 35.0$  mol%,  $T = 15.0^{\circ}\text{C}$ ], and (c) RC [ $\phi_{ec} = 35.0$  mol%,  $T = 22.5^{\circ}\text{C}$ ] phases showing the equatorial reflection from in-plane chain ordering.

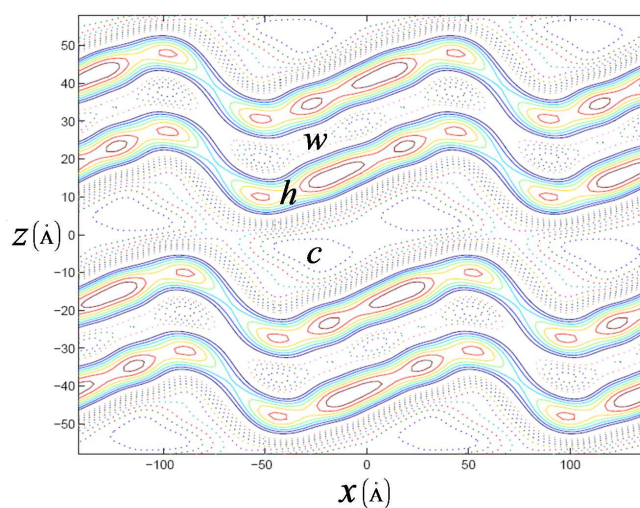

FIG. 8: Typical electron density map of the  $P_{\beta'}$  phase of DPPC bilayers. Bands labeled  $w$  and  $h$  correspond to the water and head group regions, whereas that labeled  $c$  corresponds to the bilayer mid-plane. Note the much longer modulation wavelength and higher amplitude compared to the  $P_{\beta'}^*$  phase of DPPC-secosteroid bilayers.
